# Supplementary material for: Preparation of polyaniline grafted graphene oxide–WO3nanocomposite and its application as a chromium(iii) chemi-sensor
Source: Royal Society of Chemistry journal article supplement (doi:10.1039/c5ra17925d), 2015-01-01

### Supporting information:

**Ω Control experiment:** I-V response of PANI-g-rGO@WO<sub>3</sub> nanocomposites/AgE sensor in presence of trivalent and hexavalent chromium ions. Concentration of analytes: 0.1 μM

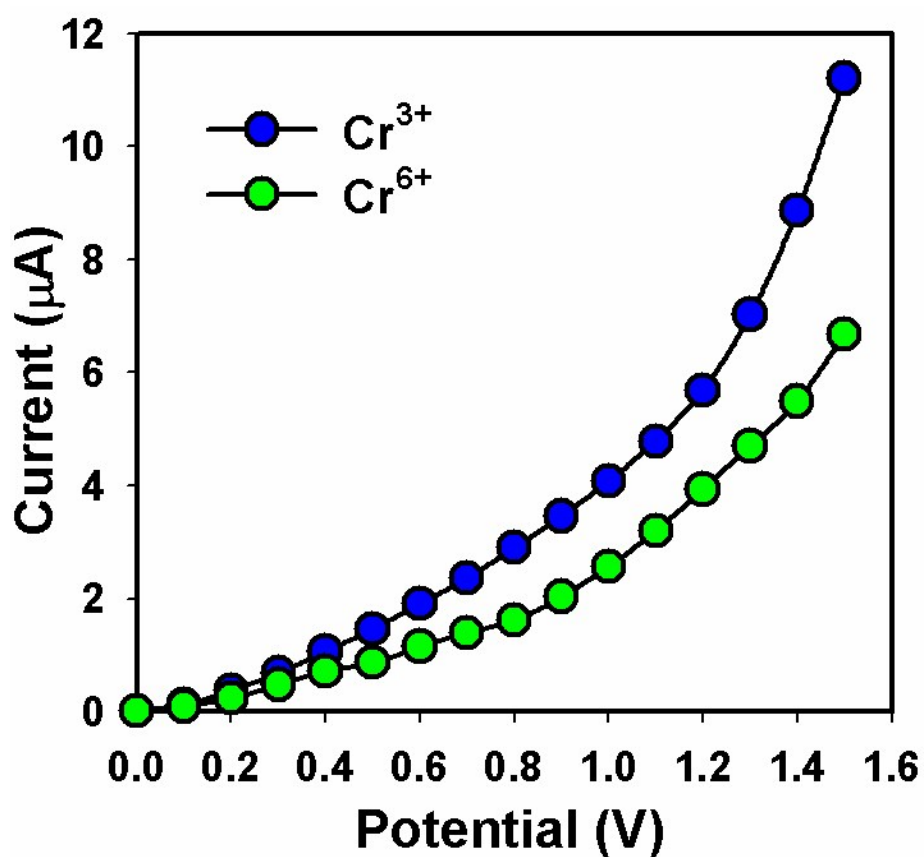

**II Scheme:** Sensing mechanism for the detection of trivalent chromium using PANI-g-rGO@WO<sub>3</sub> nanocomposites/AgE by I-V methods. (a) AgE fabrication, (b) Interaction of Cr<sup>3+</sup> with PANI-g-rGO@WO<sub>3</sub> nanocomposites, and (c) I-V response.

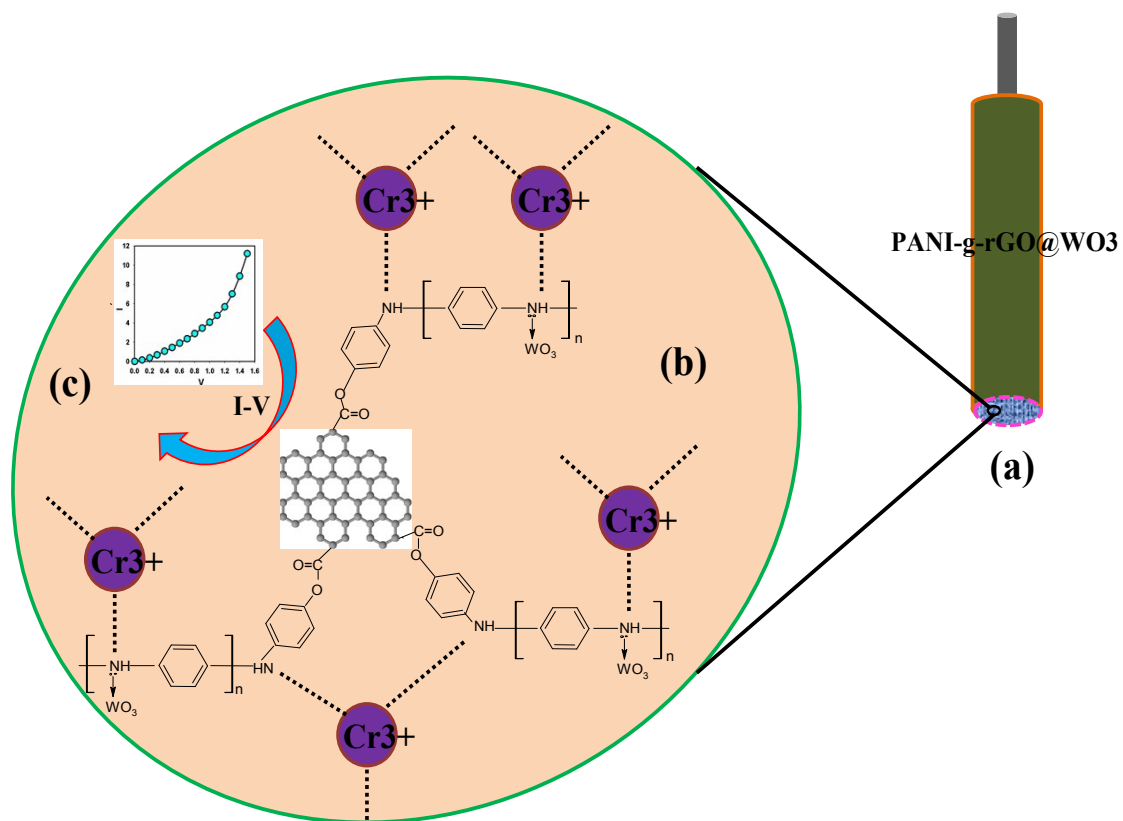

**Ψ Comparison:** Effects on analysis of  $\text{Cr}^{3+}$  I-V responses of PANI, rGO and  $\text{WO}_3$  compared to PANI-g-rGO@ $\text{WO}_3$  nanocomposites.

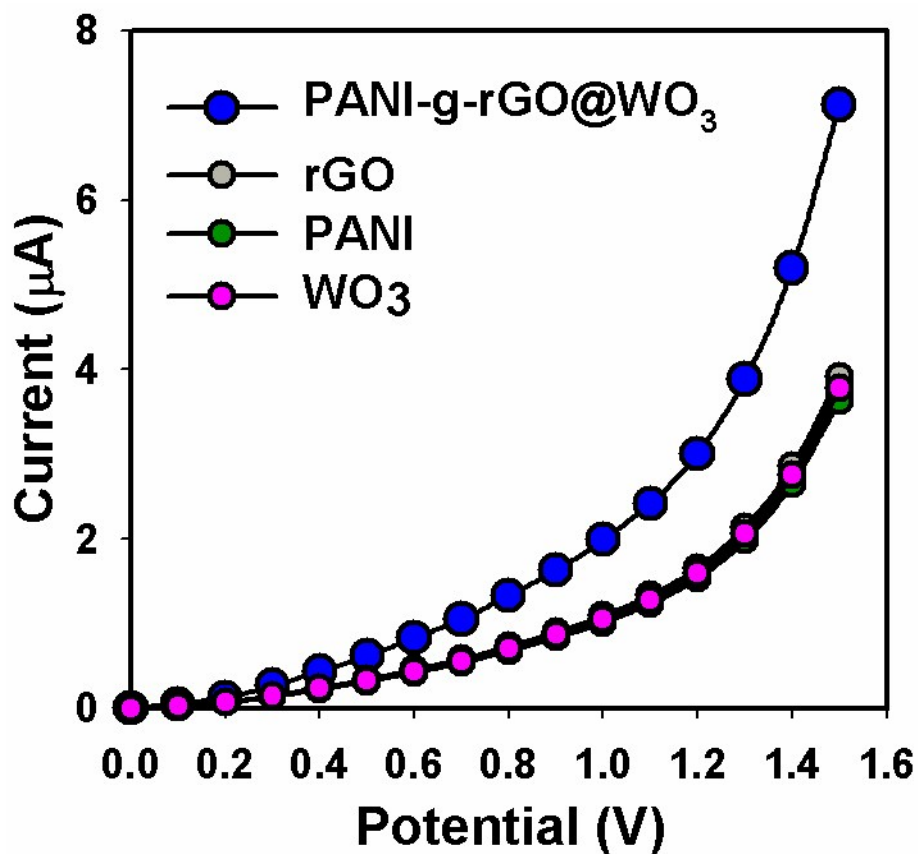

§ Calibration curve is plotted in terms of current density versus analyte concentration.

Sensitivity:  $\sim 204.866 \mu\text{A}\cdot\text{mM}^{-1}\cdot\text{cm}^{-3}$

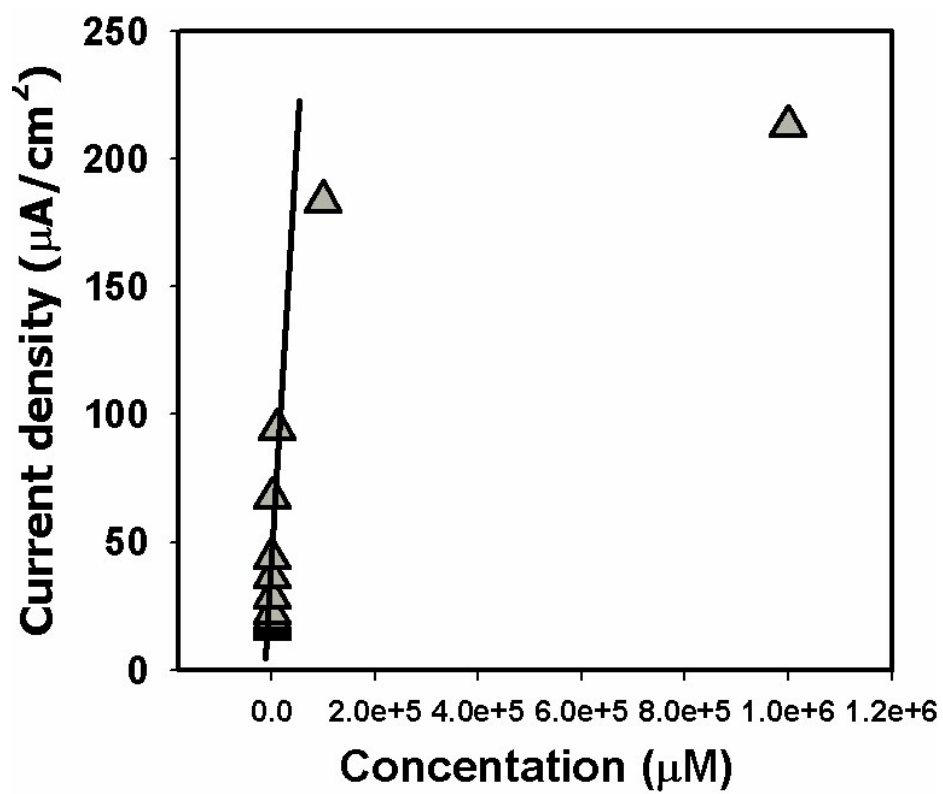

$\beta$  Response time (10s)

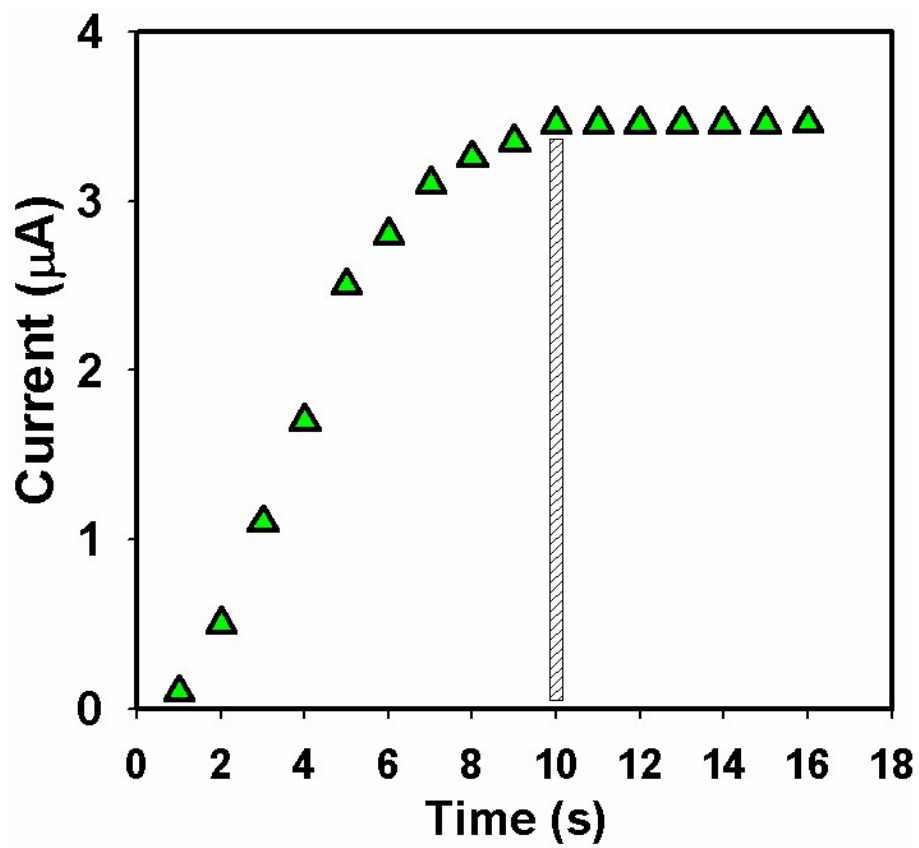

ξ SEM Images of PANI(A), rGO (B), rGO-WO<sub>3</sub> (C) and PANI-r-GO-WO<sub>3</sub> (D) composite showing different morphologies

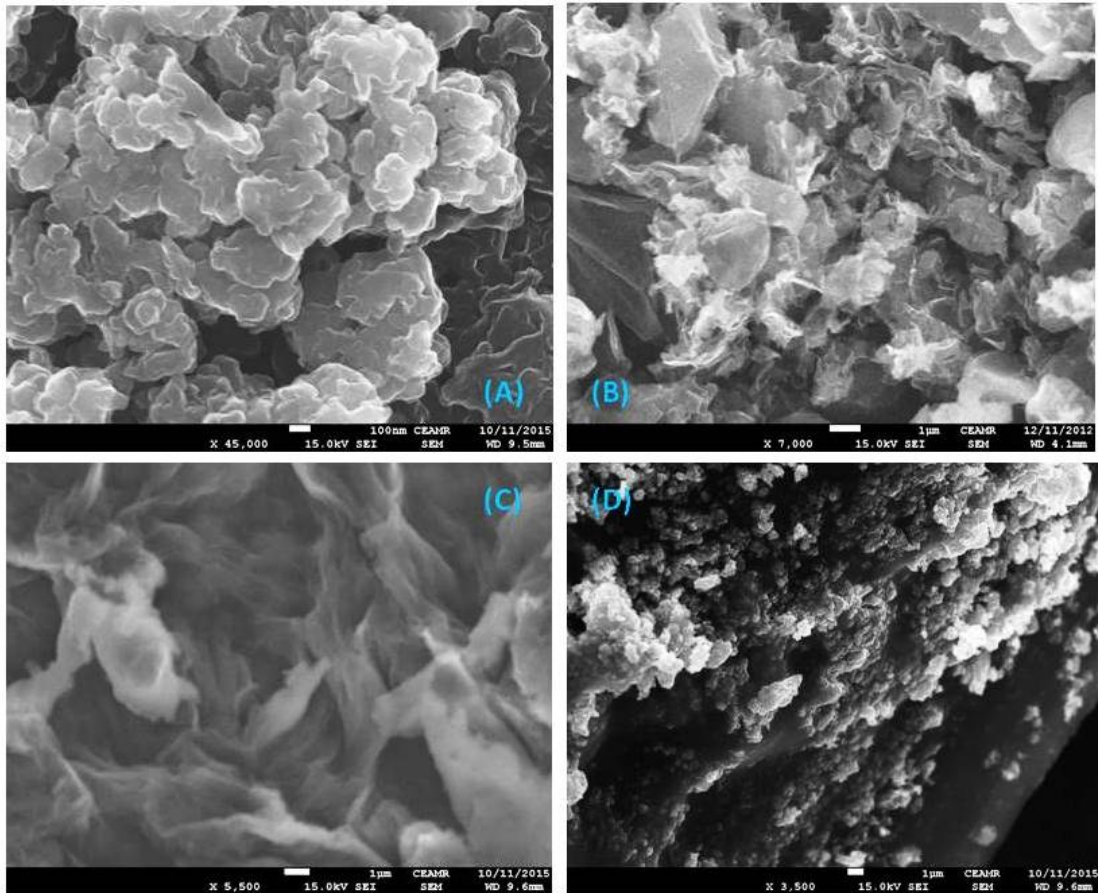

Φ A comparative I-V responses were studied for Cr(III) and Cr(IV) with PANI-g-rGO@WO<sub>3</sub> nanocomposites fabricated AgE. Concentration of analytes were kept at 0.1 μM

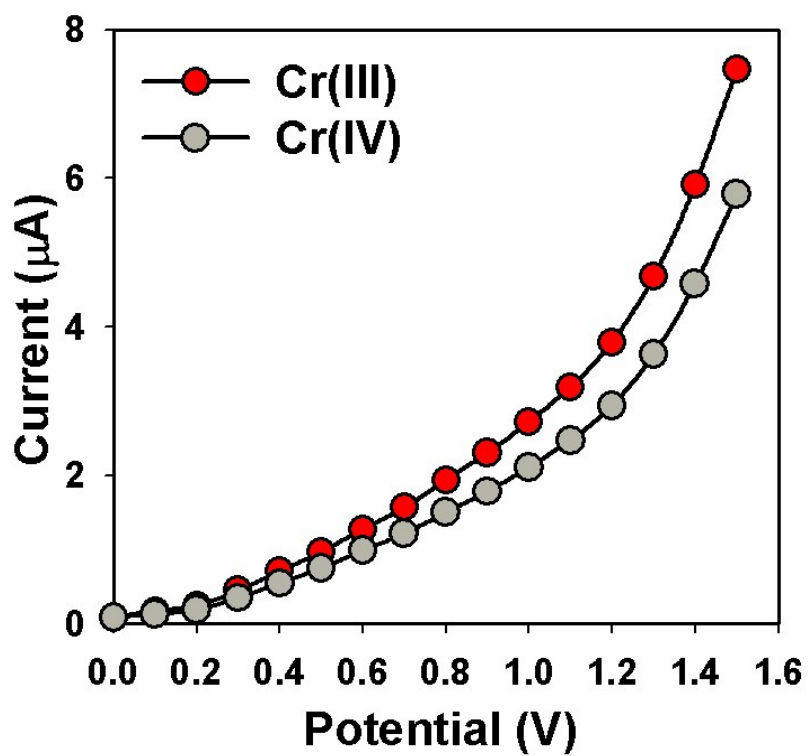

Supplement: c5ra17925d1.pdf [file c5ra17925d1.pdf]
